# Supplementary material for: Selenoprotein N‐related myopathy: a retrospective natural history study to guide clinical trials
Source: PubMed Central journal article supplement — Ann Clin Transl Neurol. 2020 Oct 10;7(11):2288–96. doi: 10.1002/acn3.51218 (PMC7664282; doi:10.1002/acn3.51218), 2020-10-10

Supplemental Figure 2. Changes over time in non-invasive nocturnal bilevel positive airway pressures

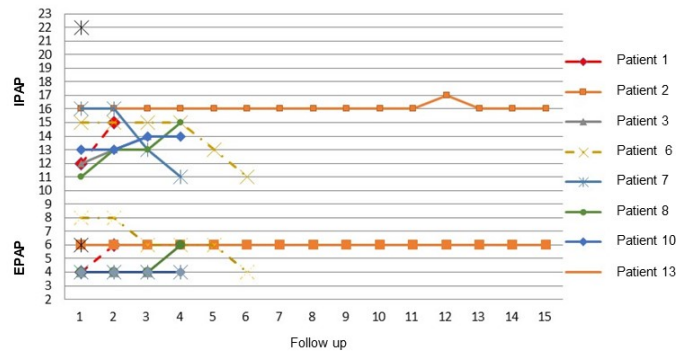

Supplement: ACN3-7-2288-s002.pdf [file ACN3-7-2288-s002.pdf]
